# Supplementary material
Source: Royal Society of Chemistry journal article supplement (doi:10.1039/d6qm00206d)
Supplement: d6qm00206d1.pdf [file d6qm00206d1.pdf]

## Supplementary Information

### Molecular level engineering of heteroatom-functionalized 2D covalent organic frameworks for highly efficient supercapacitor performance

Kamal Prakash<sup>a</sup>, Zahir Abbas<sup>a</sup>, Rakesh Deka<sup>a,c</sup>, and Shaikh M. Mobin<sup>\*a,b</sup>

\*Corresponding authors

<sup>a</sup>Department of Chemistry, Indian Institute of Technology Indore, Khandwa Road, Simrol, Indore 453552, India.

<sup>b</sup>Center of Advanced Electronics (CAE), Indian Institute of Technology Indore, Khandwa Road, Simrol, Indore 453552, India.

<sup>c</sup>Department of Chemistry, Dhing College, Dhing 782123, India.

E-mail: xray@iiti.ac.in

[Tel:+917316603336](tel:+917316603336)

## EXPERIMENTAL SECTION

### Materials

benzo[1,2-b:3,4-b':5,6-b'']trithiophene-2,5,8-tricarbaldehyde (BTT-CHO), 2,4,6-tris(4-aminophenyl)-1,3,5-triazine (TPT-NH<sub>2</sub>), 1,3,5-tris-(4-formylphenyl)benzene (TPT-CHO), *ortho*-dichlorobenzene (*o*-DCB), *n*-butanol (*n*-BuOH), mesitylene, dioxane, acetic acid, and KOH were purchased from Finar and Merck chemicals. Chemicals were obtained from commercial sources and used without purification. Moreover, the aqueous KOH solutions were prepared by using deionized water.

### Characterization

All the reagents and solvents were purchased from a commercial source without further purification. Thermogravimetric analysis (TGA) was performed on a METTLER TOLEDO (TGA/DSC1) system using STARe software at a heating rate of 10 °C/min under N<sub>2</sub> atmosphere to 800 °C. For the Powder X-ray diffraction (PXRD) analysis, Cu K $\alpha$  (0.154 nm) monochromatic radiation was used with a Bruker D2-Phaser X-ray diffractometer. The morphologies were investigated by a Supra55 Zeiss field emission scanning electron microscope (FESEM), and HR-TEM using 300 KV (Tecnai G2 F 30). Brunauer-Emmett-Teller

(BET) surface area and Barrett-Joyner-Halenda (BJH) distribution determinations were conducted on an Autosorb iQ (Quantachrome Instruments, version 1.11). The FT-IR experiment was performed using a PerkinElmer Spectrum Two with ATR mode. <sup>1</sup>H NMR (400 MHz) spectra were recorded on a Bruker 400 MHz FT-NMR at room temperature. <sup>1</sup>H NMR chemical shifts are reported in parts per million (ppm) relative to the solvent residual peak (CDCl<sub>3</sub>). Solid-state <sup>13</sup>C NMR was recorded on a JEOL Japan (JNM EC500). XPS analysis was performed on an ESCA+ instrument (Omicron Nanotechnology, Germany). The simulated PXRD data of BTT-TPT-COF was generated using Material Studio. The simulated PXRD data for TPT-COF were obtained from the literature reported below.

## Reference

1. D. Ongari, M. J. Pougin, A. V. Yakutovich, L. Talirz and B. Smit, Building a consistent and reproducible database for adsorption evaluation in Covalent-Organic Frameworks, *Materials Cloud Archive*, 2023, **165**, 2023, <https://doi.org/10.24435/materialscloud:cz-kq>

## Preparation and Electrochemical Measurement

Carbon cloth (CC) was used as the electrode substrate, with 2 M KOH as the electrolyte, to examine the electrochemical performances of COFs. 1 mg of each electrode material was sonicated separately in 300 μL of ethanol. These samples were drop-cast onto CC (1×1 cm<sup>2</sup>) and dried at room temperature. The modified electrodes were used for electrochemical studies performed on an Autolab PGSTAT 204N workstation. The assessments were performed at ambient temperature using a conventional three-electrode setup. Specifically, the electrochemical cell consisted of a platinum wire counter electrode, an Ag/AgCl reference electrode, and a carbon cloth (CC) working electrode. The electrochemical properties of the synthesized COFs' electroactive material were comprehensively evaluated using key techniques: cyclic voltammetry (CV), galvanostatic charge-discharge (GCD), and electrochemical impedance spectroscopy (EIS).

## Efficiency Evaluation

The electrochemical performance of COFs was evaluated using galvanostatic charge-discharge (GCD) measurements. The specific capacitance ( $C_s$ ) was calculated using the following equation:

$$C_s = \frac{I \Delta t}{m \Delta V} \quad (1)$$

where  $I/m$  is the current density,  $\Delta t$  is the discharge time, and  $\Delta V$  is the potential range of the GCD profile. The specific capacity ( $Q$ ) of COFs was estimated using the following equation:

$$Q = \frac{I \Delta t}{m} \quad (2)$$

$I/m$  is the current density, and  $\Delta t$  is the discharge time.

## Device Fabrication

We used COFs (active material) as the positive electrode, activated carbon as the negative electrode, cellulose paper as the separator, carbon paper (2x4 cm) as the substrate, and 1 M KOH/PVA as the gel electrolyte for device fabrication. Initially, 3 mg cm<sup>-2</sup> of active material was pasted on carbon paper, and the negative electrode (3 mg cm<sup>-2</sup>) was coated onto another substrate of carbon paper. The device was assembled with a separator between the positive and negative electrodes. It was then charged using a 300 mAh adapter, and the assembled device successfully powered a commercial LED bulb.

## Synthetic procedure

### Synthesis of BTT-TPT-COF

A Pyrex tube (10 mL) was charged with a mixture of benzo[1,2-b:3,4-b':5,6 b'']trithiophene-2,5,8-tricarbaldehyde (20 mg, 0.06 mmol), 2,4,6-tris(4-aminophenyl) 1,3,5-triazine (23mg, 0.06 mmol), 2.8 mL of butanol/1,2-dichlorobenzene (v/v, 1:1), and 0.2 mL of 6 M aqueous acetic acid. The tube was degassed by three freeze–pump–thaw cycles. The tube was sealed off and then heated at 120 °C for 3 days. The powder collected was washed with tetrahydrofuran, methanol, and tetrahydrofuran several times, and dried at 100 °C under vacuum for 12 h to obtain the **BTT-TPT-COF** sample in 87% isolated yield.

### Synthesis of TPT-COF

A Pyrex tube (10 mL) was charged with a mixture of 1,3,5-tris-(4-formylphenyl) benzene (11.7 mg, 0.03 mmol) and 1,3,5-tris-(4-aminophenyl) triazine (10.6 mg, 0.03 mmol), 1.0 mL of mesitylene/1,4-dioxane (v/v, 1:1), and 0.2 mL of 6 M aqueous acetic acid. The tube was degassed by three freeze–pump–thaw cycles. The tube was sealed off and then heated at 120 °C for 3 days. The powder collected was washed with tetrahydrofuran, methanol, and tetrahydrofuran several times, and dried at 100 °C under vacuum for 12 h to obtain **TPT-COF** sample in 80% isolated yield.

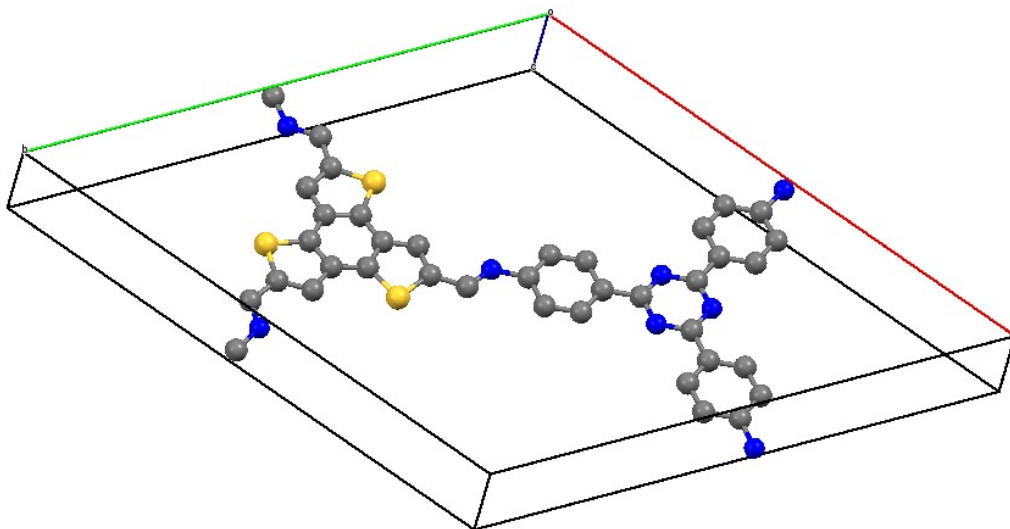

**Fig. S1:** Unit cell packing of modeled **BTT-TPT-COF**

**Table S1:** Unit cell parameters of modeled **BTT-TPT-COF**.

| Crystal system: Triclinic |                      |
|---------------------------|----------------------|
| Space group: P1           |                      |
| $a = 21.5453$             | $\alpha = 90^\circ$  |
| $b = 21.5453$             | $\beta = 90^\circ$   |
| $c = 3.4962$              | $\gamma = 120^\circ$ |

**Table S2:** Atomic coordinates of modeled BTT-TPT-COF.

|    |   |         |         |         |
|----|---|---------|---------|---------|
| C1 | C | 0.26186 | 0.64404 | 0.50000 |
| C2 | C | 0.28390 | 0.59500 | 0.50000 |
| S3 | S | 0.29248 | 0.78277 | 0.50000 |
| C4 | C | 0.38145 | 0.84078 | 0.50000 |
| C5 | C | 0.42295 | 0.80980 | 0.50000 |
| C6 | C | 0.40975 | 0.91700 | 0.50000 |

|     |   |         |         |         |
|-----|---|---------|---------|---------|
| N7  | N | 0.48273 | 0.52277 | 0.50000 |
| C8  | C | 0.52247 | 0.48707 | 0.50000 |
| C9  | C | 0.59638 | 0.52241 | 0.50000 |
| C10 | C | 0.63187 | 0.48441 | 0.50000 |
| C11 | C | 0.59443 | 0.41052 | 0.50000 |
| C12 | C | 0.52059 | 0.37556 | 0.50000 |
| C13 | C | 0.48529 | 0.41369 | 0.50000 |
| C14 | C | 0.63213 | 0.37023 | 0.50000 |
| N15 | N | 0.70329 | 0.40424 | 0.50000 |
| H16 | H | 0.47979 | 0.83829 | 0.50000 |
| H17 | H | 0.37248 | 0.93532 | 0.50000 |
| H18 | H | 0.62728 | 0.57893 | 0.50000 |
| H19 | H | 0.68875 | 0.51280 | 0.50000 |
| H20 | H | 0.49022 | 0.31873 | 0.50000 |
| H21 | H | 0.42848 | 0.38628 | 0.50000 |
| C22 | C | 0.35596 | 0.61782 | 0.50000 |
| C23 | C | 0.40500 | 0.68890 | 0.50000 |
| S24 | S | 0.21723 | 0.50971 | 0.50000 |
| C25 | C | 0.15922 | 0.54067 | 0.50000 |
| C26 | C | 0.19020 | 0.61315 | 0.50000 |

|     |   |         |         |         |
|-----|---|---------|---------|---------|
| C27 | C | 0.08300 | 0.49275 | 0.50000 |
| N28 | N | 0.47723 | 0.95996 | 0.50000 |
| C29 | C | 0.51293 | 0.03540 | 0.50000 |
| C30 | C | 0.47759 | 0.07397 | 0.50000 |
| C31 | C | 0.51559 | 0.14746 | 0.50000 |
| C32 | C | 0.58948 | 0.18391 | 0.50000 |
| C33 | C | 0.62444 | 0.14503 | 0.50000 |
| C34 | C | 0.58631 | 0.07160 | 0.50000 |
| C35 | C | 0.62977 | 0.26190 | 0.50000 |
| N36 | N | 0.59576 | 0.29905 | 0.50000 |
| H37 | H | 0.16171 | 0.64150 | 0.50000 |
| H38 | H | 0.06468 | 0.43716 | 0.50000 |
| H39 | H | 0.42107 | 0.04835 | 0.50000 |
| H40 | H | 0.48720 | 0.17595 | 0.50000 |
| H41 | H | 0.68127 | 0.17149 | 0.50000 |
| H42 | H | 0.61372 | 0.04220 | 0.50000 |
| C43 | C | 0.38218 | 0.73814 | 0.50000 |
| C44 | C | 0.31110 | 0.71610 | 0.50000 |
| S45 | S | 0.49029 | 0.70752 | 0.50000 |
| C46 | C | 0.45933 | 0.61855 | 0.50000 |

|     |   |         |         |         |
|-----|---|---------|---------|---------|
| C47 | C | 0.38685 | 0.57705 | 0.50000 |
| C48 | C | 0.50725 | 0.59025 | 0.50000 |
| N49 | N | 0.04004 | 0.51727 | 0.50000 |
| C50 | C | 0.96460 | 0.47753 | 0.50000 |
| C51 | C | 0.92603 | 0.40362 | 0.50000 |
| C52 | C | 0.85254 | 0.36813 | 0.50000 |
| C53 | C | 0.81609 | 0.40557 | 0.50000 |
| C54 | C | 0.85497 | 0.47941 | 0.50000 |
| C55 | C | 0.92840 | 0.51471 | 0.50000 |
| C56 | C | 0.73810 | 0.36787 | 0.50000 |
| N57 | N | 0.70095 | 0.29671 | 0.50000 |
| H58 | H | 0.35850 | 0.52021 | 0.50000 |
| H59 | H | 0.56284 | 0.62752 | 0.50000 |
| H60 | H | 0.95165 | 0.37272 | 0.50000 |
| H61 | H | 0.82405 | 0.31125 | 0.50000 |
| H62 | H | 0.82851 | 0.50978 | 0.50000 |
| H63 | H | 0.95780 | 0.57152 | 0.50000 |

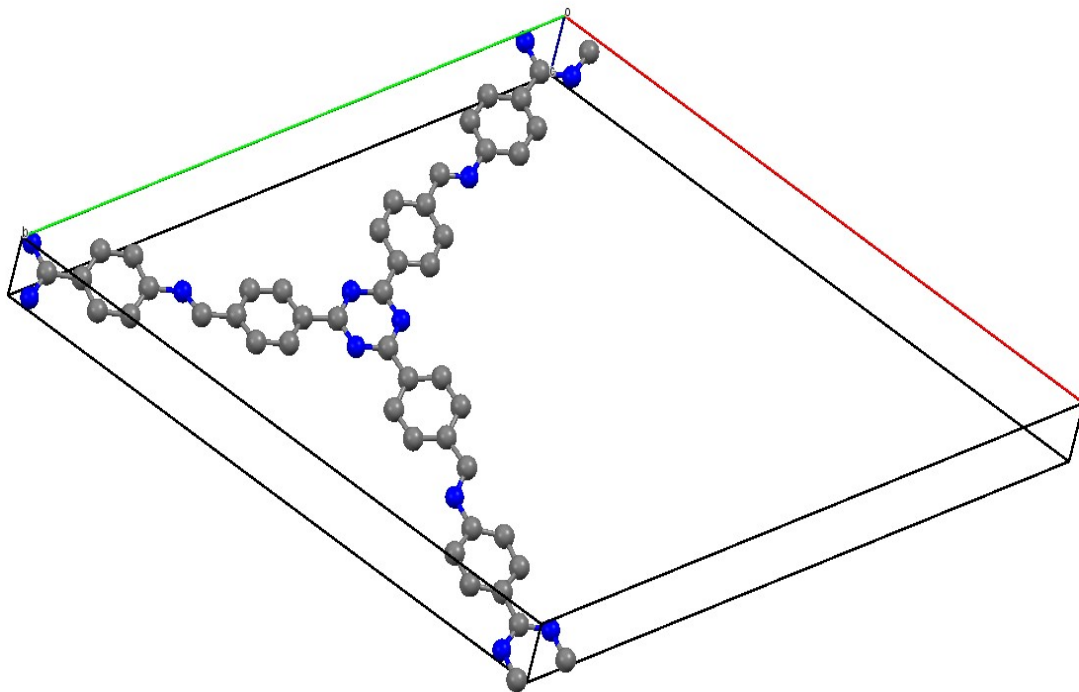

**Fig. S2:** Unit cell packing of modeled TPT-COF

**Table S3:** Unit cell parameters of modeled TPT-COF (adopted from previous literature).

| Crystal system: Triclinic |                      |
|---------------------------|----------------------|
| Space group: P1           |                      |
| $a = 25.4016$             | $\alpha = 90^\circ$  |
| $b = 25.4016$             | $\beta = 90^\circ$   |
| $c = 3.5076$              | $\gamma = 120^\circ$ |

**Table S4:** Atomic coordinates of modeled TPT-COF.

|    |   |         |         |         |
|----|---|---------|---------|---------|
| N1 | N | 0.15567 | 0.83995 | 0.50893 |
| N2 | N | 0.27385 | 0.64359 | 0.46693 |
| N3 | N | 0.97007 | 0.94002 | 0.52920 |
| C4 | C | 0.06332 | 0.93693 | 0.52705 |

|     |   |         |         |         |
|-----|---|---------|---------|---------|
| C5  | C | 0.03291 | 0.87462 | 0.49761 |
| C6  | C | 0.06422 | 0.84381 | 0.49265 |
| C7  | C | 0.12619 | 0.87422 | 0.51492 |
| C8  | C | 0.15685 | 0.93650 | 0.55035 |
| C9  | C | 0.12567 | 0.96747 | 0.55463 |
| C10 | C | 0.21218 | 0.86018 | 0.45980 |
| C11 | C | 0.23651 | 0.81961 | 0.46320 |
| C12 | C | 0.19937 | 0.75803 | 0.50679 |
| C13 | C | 0.22319 | 0.72027 | 0.50747 |
| C14 | C | 0.28472 | 0.74337 | 0.46627 |
| C15 | C | 0.32178 | 0.80510 | 0.42394 |
| C16 | C | 0.29787 | 0.84278 | 0.42168 |
| C17 | C | 0.31009 | 0.70334 | 0.46695 |
| C18 | C | 0.93958 | 0.96973 | 0.52929 |
| H19 | H | 0.98493 | 0.84982 | 0.47642 |
| H20 | H | 0.04037 | 0.79592 | 0.46843 |
| H21 | H | 0.20450 | 0.96149 | 0.58097 |
| H22 | H | 0.15025 | 0.01538 | 0.58248 |
| H23 | H | 0.24243 | 0.90682 | 0.40816 |
| H24 | H | 0.15191 | 0.73930 | 0.54043 |

|     |   |         |         |         |
|-----|---|---------|---------|---------|
| H25 | H | 0.19359 | 0.67298 | 0.54246 |
| H26 | H | 0.36928 | 0.82413 | 0.38993 |
| H27 | H | 0.32730 | 0.89011 | 0.38686 |
| N28 | N | 0.16005 | 0.31572 | 0.50893 |
| N29 | N | 0.35641 | 0.63026 | 0.46693 |
| N30 | N | 0.05998 | 0.03005 | 0.52920 |
| C31 | C | 0.06307 | 0.12639 | 0.52705 |
| C32 | C | 0.12538 | 0.15829 | 0.49761 |
| C33 | C | 0.15619 | 0.22041 | 0.49265 |
| C34 | C | 0.12578 | 0.25197 | 0.51492 |
| C35 | C | 0.06350 | 0.22035 | 0.55035 |
| C36 | C | 0.03253 | 0.15820 | 0.55463 |
| C37 | C | 0.13982 | 0.35200 | 0.45980 |
| C38 | C | 0.18039 | 0.41690 | 0.46320 |
| C39 | C | 0.24197 | 0.44134 | 0.50679 |
| C40 | C | 0.27973 | 0.50292 | 0.50747 |
| C41 | C | 0.25663 | 0.54135 | 0.46627 |
| C42 | C | 0.19490 | 0.51668 | 0.42394 |
| C43 | C | 0.15722 | 0.45509 | 0.42168 |
| C44 | C | 0.29666 | 0.60675 | 0.46695 |

|     |   |         |         |         |
|-----|---|---------|---------|---------|
| C45 | C | 0.03027 | 0.96985 | 0.52929 |
| H46 | H | 0.15018 | 0.13511 | 0.47642 |
| H47 | H | 0.20408 | 0.24445 | 0.46843 |
| H48 | H | 0.03851 | 0.24301 | 0.58097 |
| H49 | H | 0.98462 | 0.13487 | 0.58248 |
| H50 | H | 0.09318 | 0.33561 | 0.40816 |
| H51 | H | 0.26070 | 0.41261 | 0.54043 |
| H52 | H | 0.32702 | 0.52061 | 0.54246 |
| H53 | H | 0.17587 | 0.54515 | 0.38993 |
| H54 | H | 0.10989 | 0.43719 | 0.38686 |
| N55 | N | 0.68428 | 0.84433 | 0.50893 |
| N56 | N | 0.36974 | 0.72615 | 0.46693 |
| N57 | N | 0.96995 | 0.02993 | 0.52920 |
| C58 | C | 0.87361 | 0.93668 | 0.52705 |
| C59 | C | 0.84171 | 0.96709 | 0.49761 |
| C60 | C | 0.77959 | 0.93578 | 0.49265 |
| C61 | C | 0.74803 | 0.87381 | 0.51492 |
| C62 | C | 0.77965 | 0.84315 | 0.55035 |
| C63 | C | 0.84180 | 0.87433 | 0.55463 |
| C64 | C | 0.64800 | 0.78782 | 0.45980 |

|     |   |         |         |         |
|-----|---|---------|---------|---------|
| C65 | C | 0.58310 | 0.76349 | 0.46320 |
| C66 | C | 0.55866 | 0.80063 | 0.50679 |
| C67 | C | 0.49708 | 0.77681 | 0.50747 |
| C68 | C | 0.45865 | 0.71528 | 0.46627 |
| C69 | C | 0.48332 | 0.67822 | 0.42394 |
| C70 | C | 0.54491 | 0.70213 | 0.42168 |
| C71 | C | 0.39325 | 0.68991 | 0.46695 |
| C72 | C | 0.03015 | 0.06042 | 0.52929 |
| H73 | H | 0.86489 | 0.01507 | 0.47642 |
| H74 | H | 0.75555 | 0.95963 | 0.46843 |
| H75 | H | 0.75699 | 0.79550 | 0.58097 |
| H76 | H | 0.86513 | 0.84975 | 0.58248 |
| H77 | H | 0.66439 | 0.75757 | 0.40816 |
| H78 | H | 0.58739 | 0.84809 | 0.54043 |
| H79 | H | 0.47939 | 0.80641 | 0.54246 |
| H80 | H | 0.45485 | 0.63072 | 0.38993 |
| H81 | H | 0.56281 | 0.67270 | 0.38686 |

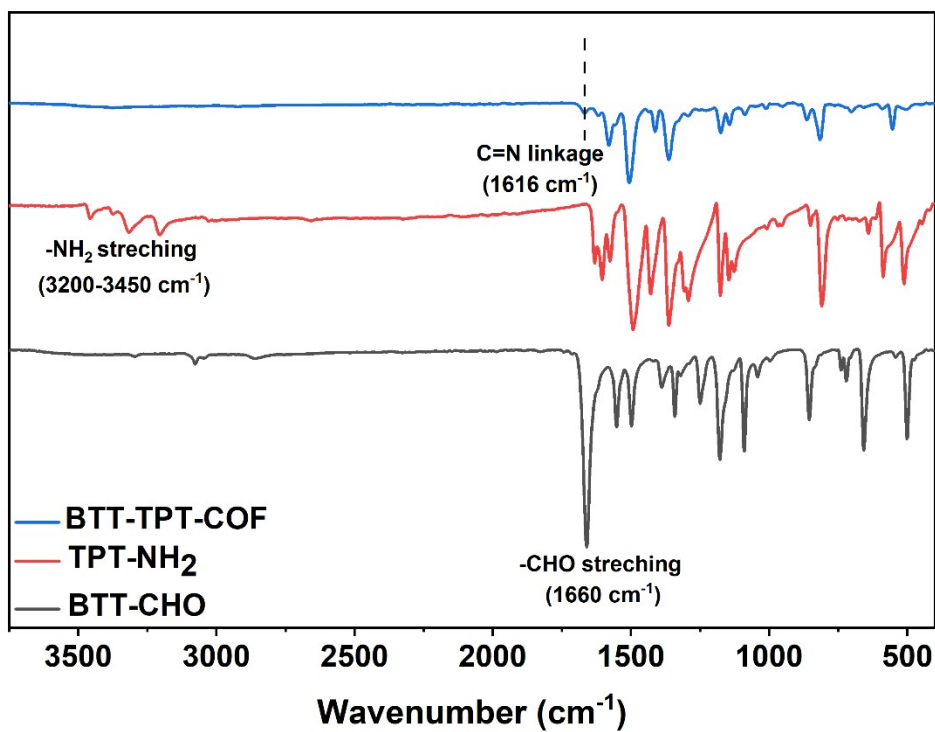

Fig. S3: comparative FTIR spectrum of BTT-TPT-COF with organic monomers

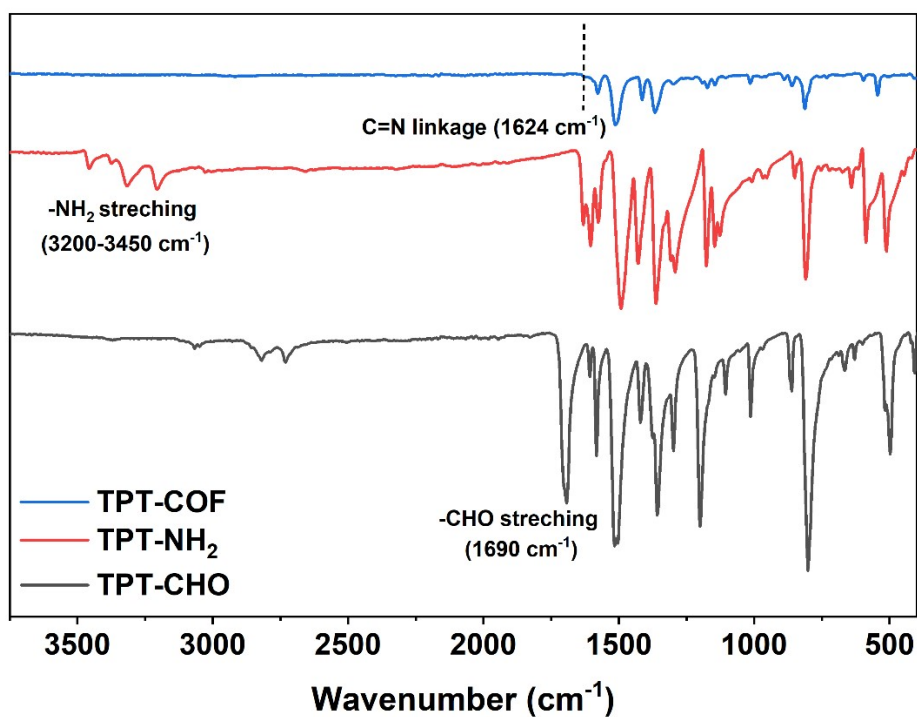

Fig. S4: comparative FTIR spectrum of TPT-COF with organic monomers

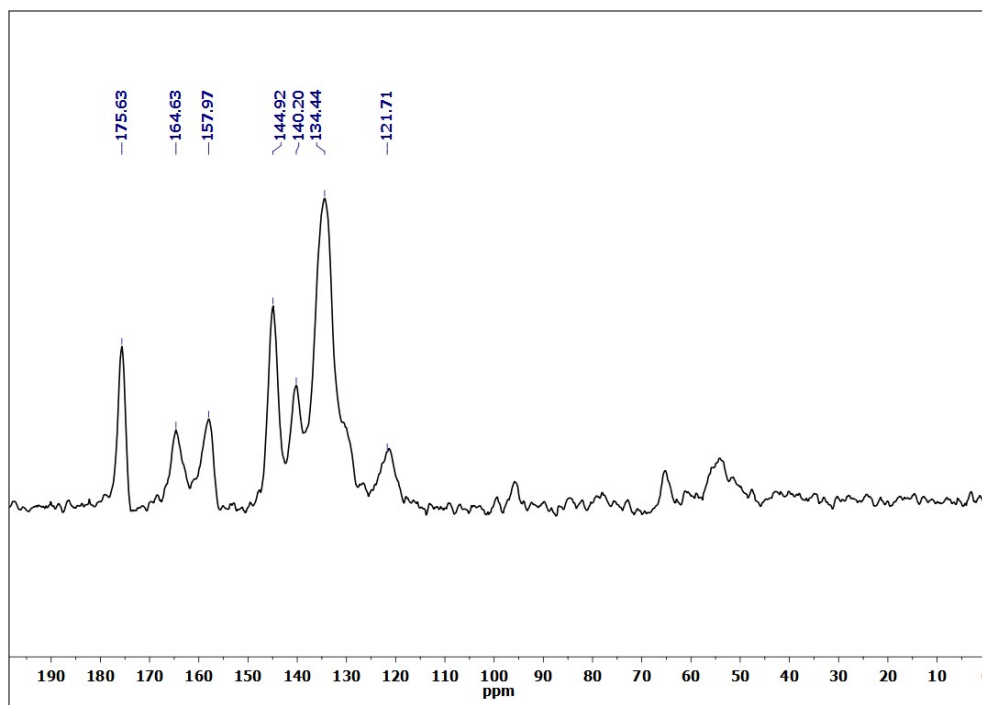

**Fig. S5:** Solid-state  $^{13}\text{C}$  NMR of TPT-COF

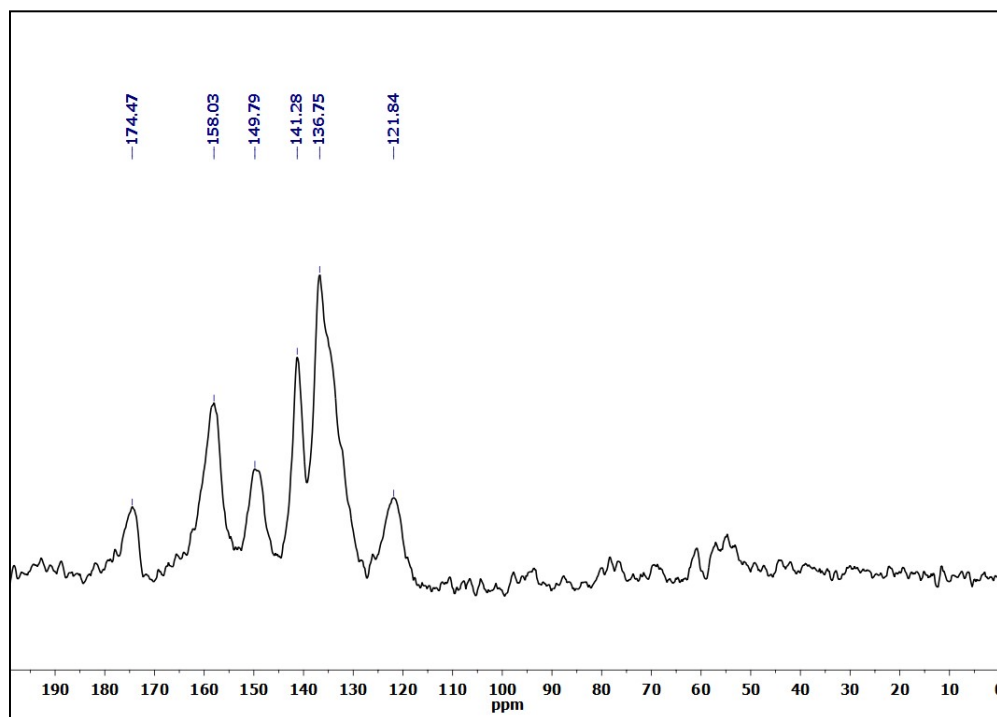

**Fig. S6:** Solid-state  $^{13}\text{C}$  NMR of BTT-TPT-COF

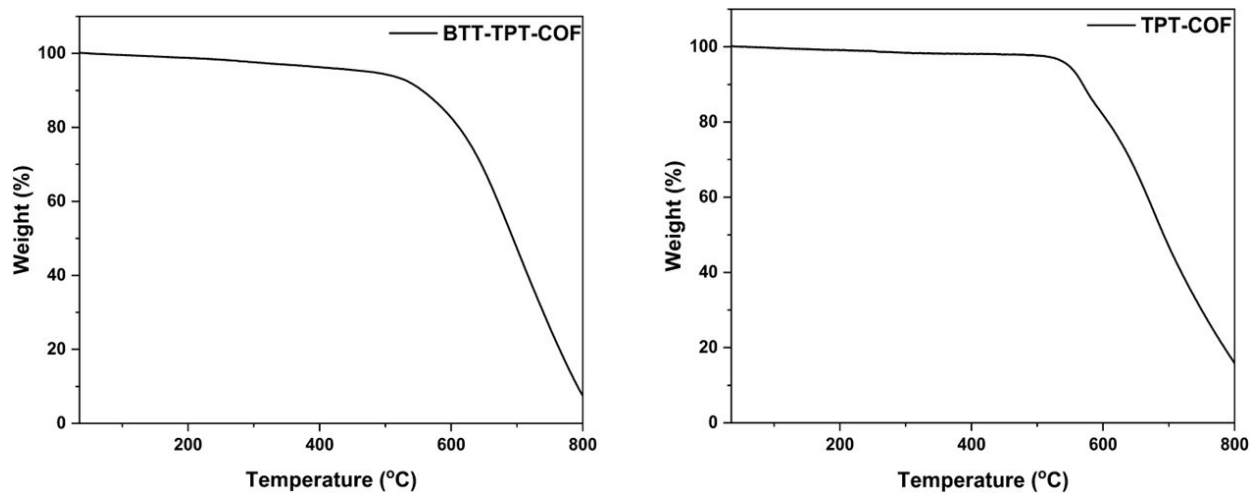

**Figure S7:** Thermogravimetric analysis (TGA) of **BTT-TPT-COF** and **TPT-COF**

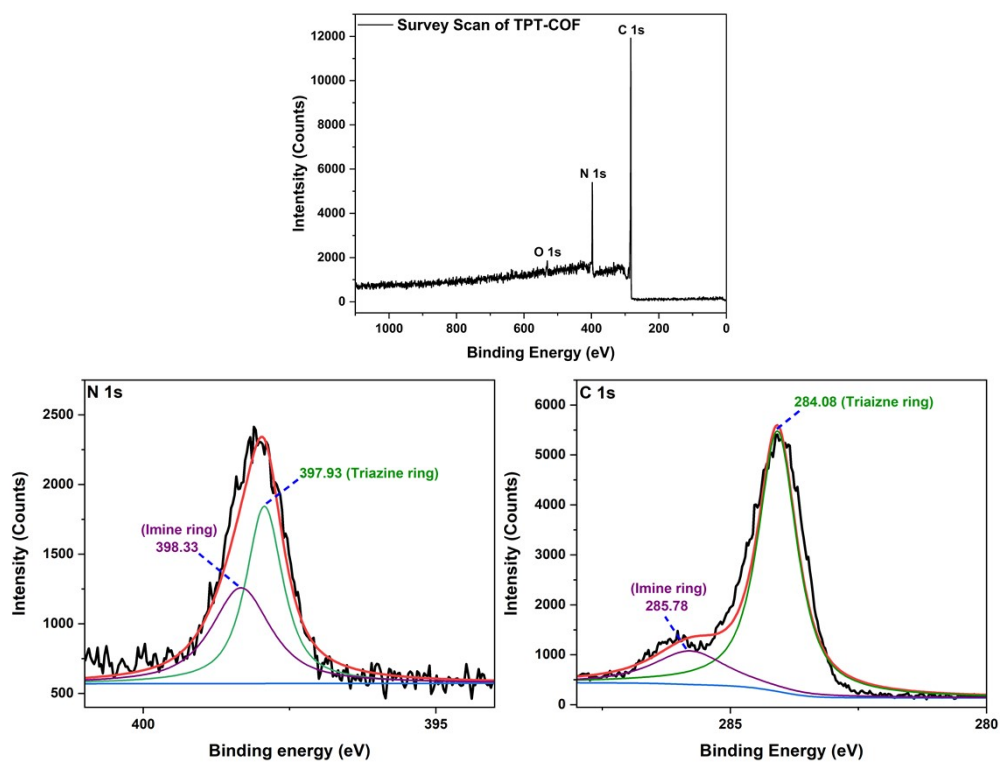

**Fig. S8:** XPS analysis of **TPT-COF**

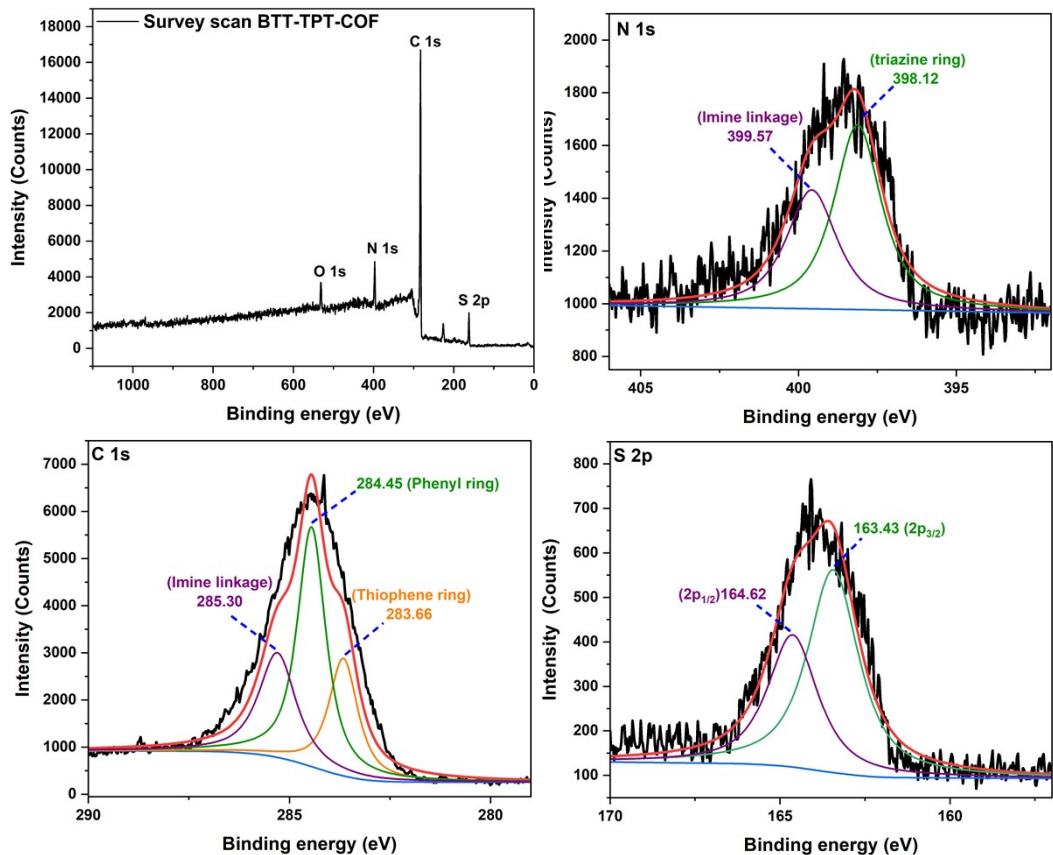

Fig. S9: XPS analysis of BTT-TPT-COF

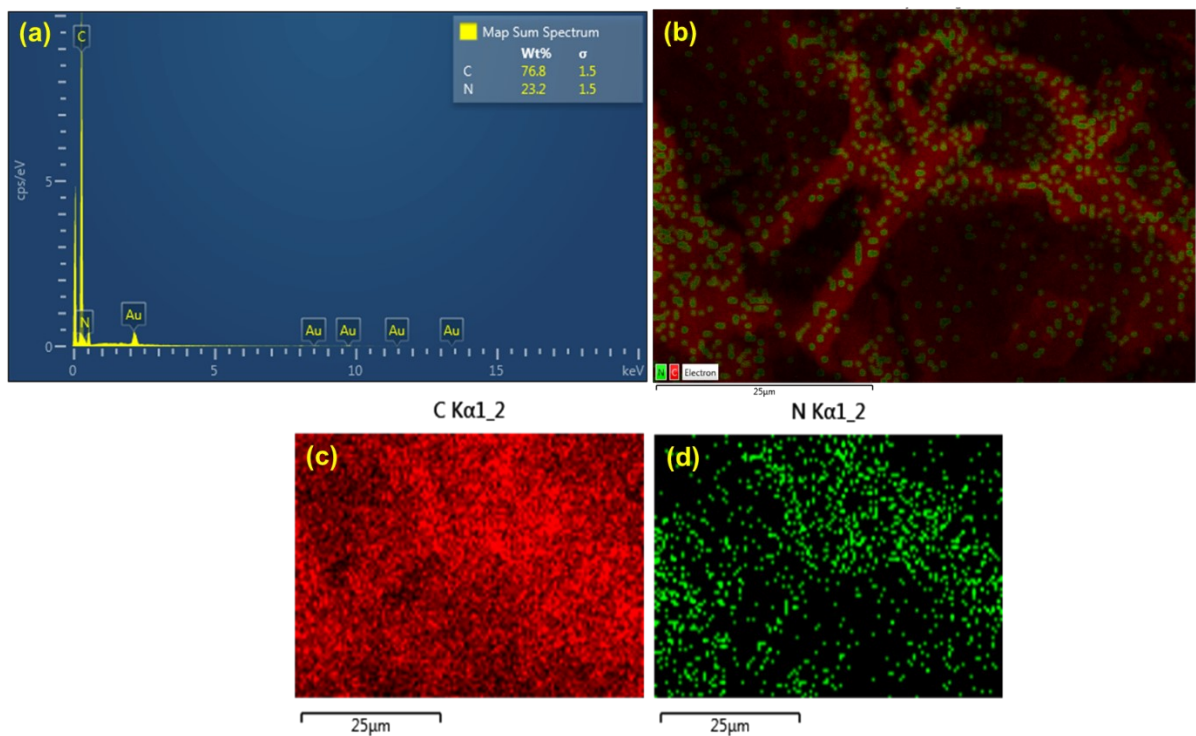

Fig. S10. (a) Elemental composition, and (b-d) elemental mapping of TPT-COF.

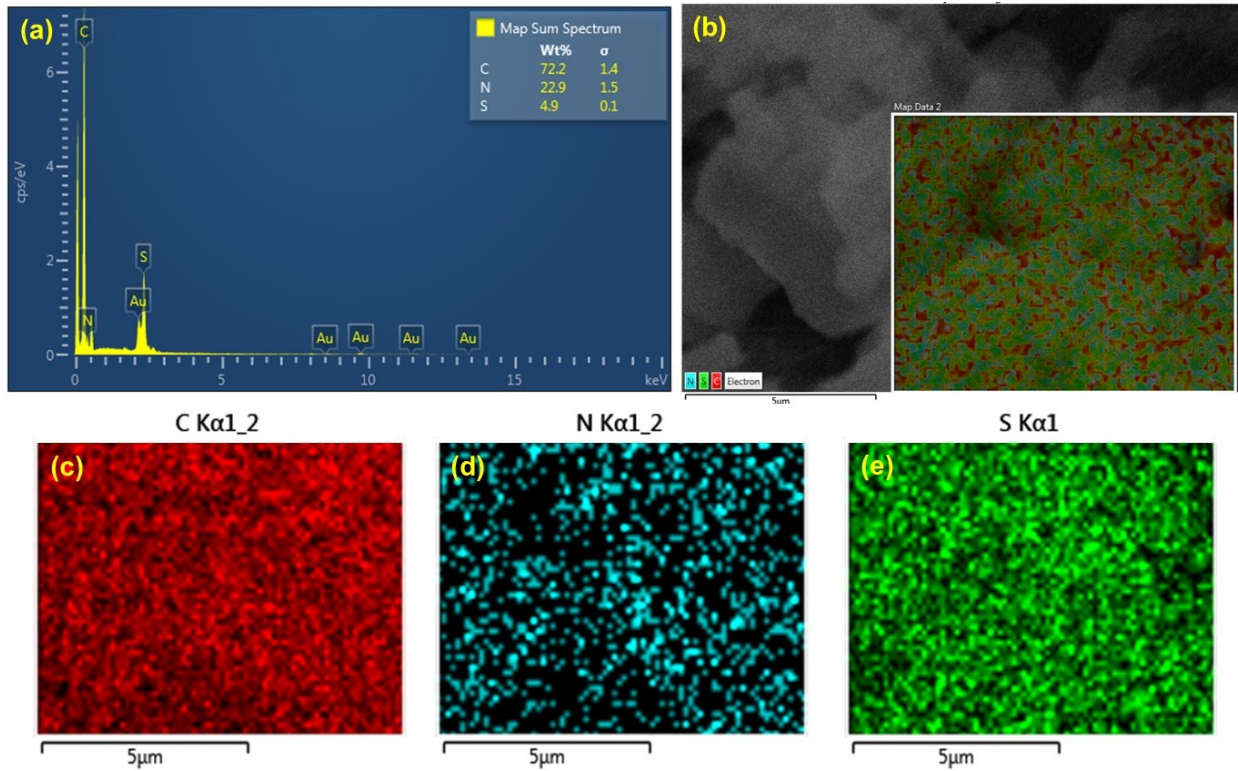

**Fig. S11.** (a) Elemental composition, and (b-e) elemental mapping of BTT-TPT-COF.

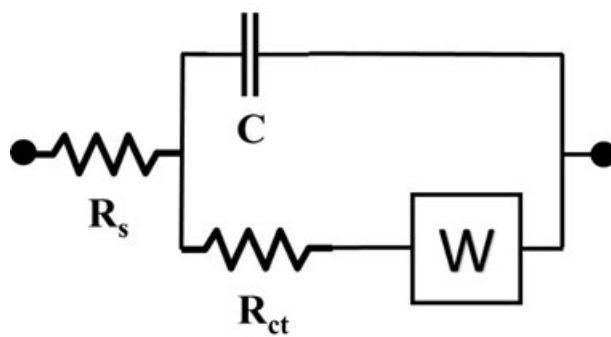

**Fig. S12:** Circuit for a three-electrode system.

**Table S5:** Circuit fitting parameter of a three-electrode system.

| Elements                     | BTT-TPT COF | TPT-COF |
|------------------------------|-------------|---------|
| $R_s$ ( $\Omega$ )           | 1.11        | 1.58    |
| $R_{CT}$ ( $\Omega$ )        | 4.11        | 7.04    |
| C ( $\mu$ F)                 | 286         | 329     |
| W (mMho*S <sup>(1/2)</sup> ) | 26.8        | 69.2    |

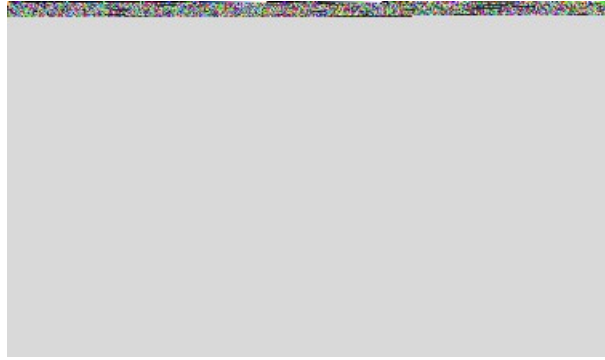

**Fig. S13:** Circuit for two electrode system **BTT-TPT-COF//AC**.

**Table S6:** Circuit fitting parameter for two electrode system **BTT-TPT-COF//AC**.

| Elements                           | BTT-TPT COF |
|------------------------------------|-------------|
| $R_s$ ( $\Omega$ )                 | 3.82        |
| $R_{CT}$ (n $\Omega$ )             | 284         |
| C ( $\mu$ F)                       | 614         |
| W ( $\mu$ Mho*S <sup>(1/2)</sup> ) | 846         |

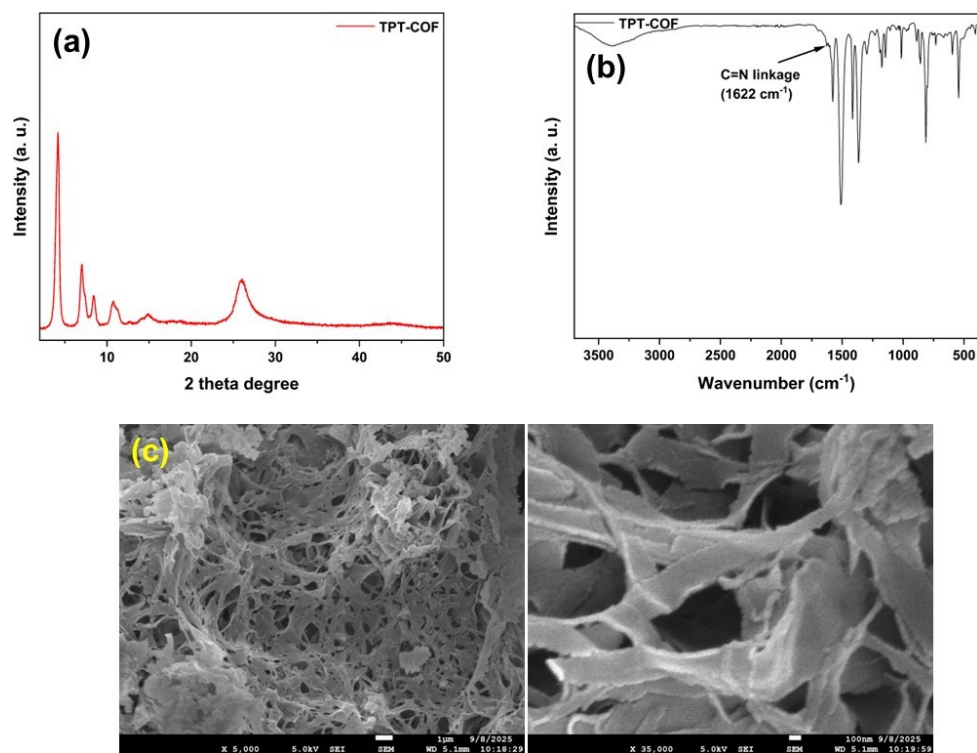

Fig. S14: (a) PXRD; (b) FTIR, (c) SEM images of TPT-COF after electrochemical study

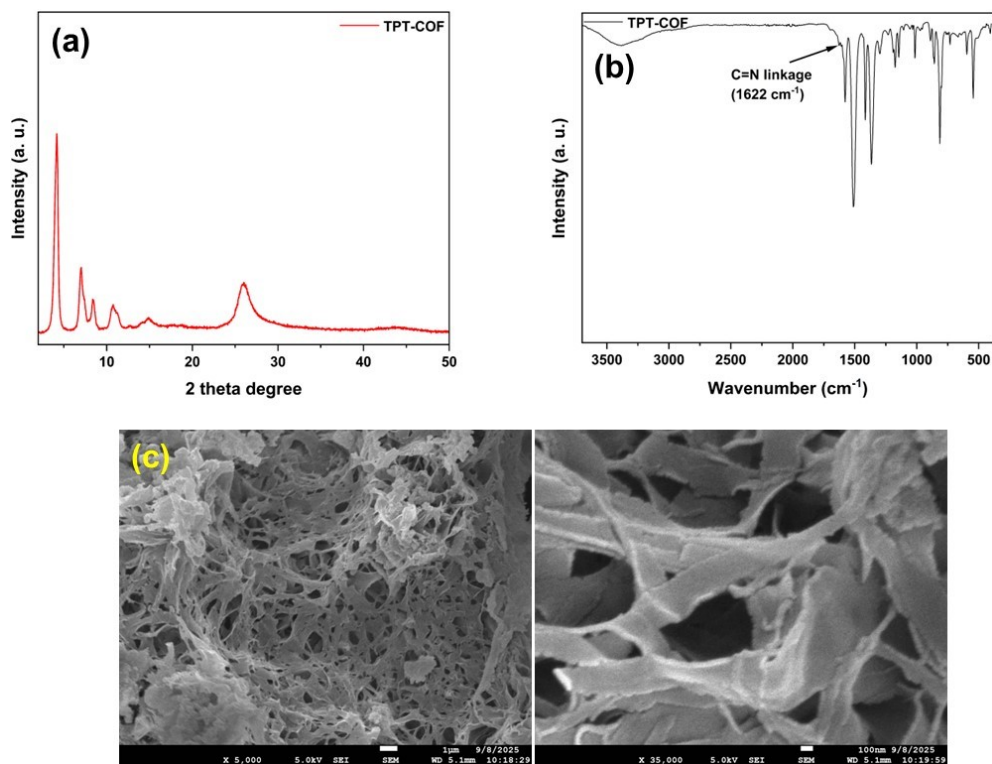

Fig. S15: (a) PXRD; (b) FTIR, (c) SEM images of BTT-TPT-COF after electrochemical study

**Table S7.** Comparative table for synthesized COFs with previously reported metal-free COFs for their supercapacitor applications

| COF as electrode material | Electrolyte                                   | Specific capacitance (F.g <sup>-1</sup> ) | Current density (A.g <sup>-1</sup> ) | Reference                                                        |
|---------------------------|-----------------------------------------------|-------------------------------------------|--------------------------------------|------------------------------------------------------------------|
| Pent-TRUX-DAB             | 1 M H <sub>2</sub> SO <sub>4</sub>            | 634                                       | 1                                    | <i>ACS Appl. Energy Mater.</i> <b>2023</b> , 6, 11890–11896      |
| TAPA-TPTCOF               | 1 M H <sub>2</sub> SO <sub>4</sub>            | 205                                       | 0.5                                  | <i>ACS Appl. Energy Mater.</i> <b>2024</b> , 7, 1723–1734        |
| SLD-COF                   | 1 M H <sub>2</sub> SO <sub>4</sub><br>1 M KOH | 31.5<br>41.7                              | 0.5                                  | <i>ACS Appl. Mater. Interfaces</i> <b>2025</b> , 17, 11027–11035 |
| TPT@BDA-COF               | 1 M NaClO <sub>4</sub>                        | 47.7                                      | 0.2                                  | <i>Chem Asian J.</i> <b>2025</b> , 20, e202401149                |
| TDMTA-TFP-COF             | 1 M KCl                                       | 327.29                                    | 2.86                                 | <i>Chem. Commun.</i> <b>2025</b> , 61, 7831–7834                 |
| PPDA-TFPT-COF             | 0.5 M H <sub>2</sub> SO <sub>4</sub>          | 250                                       | 1                                    | <i>Chem. Eur. J.</i> <b>2025</b> , 31, e202501252                |
| a-COF                     | 1 M H <sub>2</sub> SO <sub>4</sub>            | 115                                       | 0.1                                  | <i>Chem. Select</i> <b>2023</b> , 8, e202301774                  |
| TFPAZO-COF                | 1 M H <sub>2</sub> SO <sub>4</sub>            | 178                                       | 0.5                                  | <i>Polymer</i> <b>2025</b> , 329, 128484                         |
| TFPB-AZO-COF              | 1 M KOH                                       | 450                                       | 1                                    | <i>J of Mol Struct</i> <b>2023</b> , 1286, 135647                |
| DPP-TBB COF               | 1 M KOH                                       | 384                                       | 0.3                                  | <i>Small</i> <b>2024</b> , 20, 2402993                           |
| PDC-MA-COF                | 6M KOH                                        | 335                                       | 1                                    | <i>ACS Appl. Mater. Interfaces</i> <b>2019</b> , 11, 26355–26363 |
| TDFP-1                    | 0.1 M H <sub>2</sub> SO <sub>4</sub>          | 354                                       | 0.5                                  | <i>ChemSusChem</i> <b>2017</b> , 10, 921–929                     |
| PT-COF                    | 0.5 M H <sub>2</sub> SO <sub>4</sub>          | 1443                                      | 0.5                                  | <i>Chem.Mater.</i> <b>2021</b> , 33, 8512–8523                   |
| TpPa-(OH) <sub>2</sub>    | 1 M phosphate buffer (pH 7.2)                 | 416                                       | 0.5                                  | <i>Chem. Mater.</i> <b>2017</b> , 29, 2074–2080                  |
| ACOF1                     | 6 M KOH                                       | 234                                       | 1                                    | <i>Chem. Eur. J.</i> <b>2017</b> , 23, 17504–17510               |
| TTF-COF1                  | 3 M KOH                                       | 752                                       | 1                                    | <i>Chem. Commun.</i> <b>2020</b> , 56, 14187-14190               |
| TPPDA-TPTPE COF           | 1 M KOH                                       | 237.1                                     | 2                                    | <i>Chem. Commun.</i> <b>2019</b> , 55, 14890-14893               |
| TPT-DAHQCOF               | 1 M KOH                                       | 256                                       | 0.5                                  | <i>Chem. Asian J.</i> <b>2019</b> , 14, 1429-1435                |
| BIBDZ                     | 1 M H <sub>3</sub> PO <sub>4</sub>            | 88.4                                      | 0.5                                  | <i>Eur. Polym J.</i> <b>2017</b> , 93, 448-                      |

|                              |                                    |            |          |                                                           |  |
|------------------------------|------------------------------------|------------|----------|-----------------------------------------------------------|--|
|                              |                                    |            |          | 457                                                       |  |
| TPA-COF                      | 1 M H <sub>2</sub> SO <sub>4</sub> | 263.1      | 0.1      | <i>J Appl Polym Sci.</i> <b>2022</b> , 139, e51510.       |  |
| TaPa-Py COF                  | 1 M H <sub>2</sub> SO <sub>4</sub> | 209        | 0.5      | <i>J. Mater. Chem. A</i> <b>2016</b> , 4, 16312–16317     |  |
| DBT-MA-COF                   | 6 M KOH                            | 407        | 1        | <i>Micropor. Mesopor. Mat.</i> <b>2021</b> , 312, 110766  |  |
| HADQ COF                     | ionic liquid                       | 174        | 0.5      | <i>Mater. Chem. Front.</i> <b>2023</b> , 7, 2464-2474     |  |
| DAT-COF                      | 1 M H <sub>2</sub> SO <sub>4</sub> | 235        | 0.5      | <i>J. Power Sources</i> <b>2023</b> , 564, 232873         |  |
| TFP-NDA-COF                  | 1 M H <sub>2</sub> SO <sub>4</sub> | 348        | 0.5      | <i>Micropor. Mesopor. Mat.</i> <b>2018</b> , 266, 109-166 |  |
| PG-BBT                       | 3 M KOH                            | 724        | 1        | <i>Polym. Chem.</i> <b>2020</b> , 11, 47–52               |  |
| TAPT-2,3-NA(OH) <sub>2</sub> | 1 M KOH                            | 271        | 0.5      | <i>Polymers</i> <b>2022</b> , 14, 3428                    |  |
| <b>TPT-COF</b>               | <b>1 M KOH</b>                     | <b>466</b> | <b>1</b> | <b>This work</b>                                          |  |
| <b>BTT-TPT-COF</b>           | <b>1 M KOH</b>                     | <b>916</b> | <b>1</b> | <b>This work</b>                                          |  |

---
